# Supplementary material
Source: publisher site journal article supplement (https://www.dovepress.com/article/353398)
Supplement: Supplementary file 1 [file get_supplementary_file.php]

**ONLINE SUPPLEMENTARY MATERIAL**

**Development and validation of a Nordic Multimorbidity Index based on hospital diagnoses and filled prescriptions**

**Kristensen et al**

**Figure S1 Flowchart of selection of the development cohort and temporal validation cohort**

**
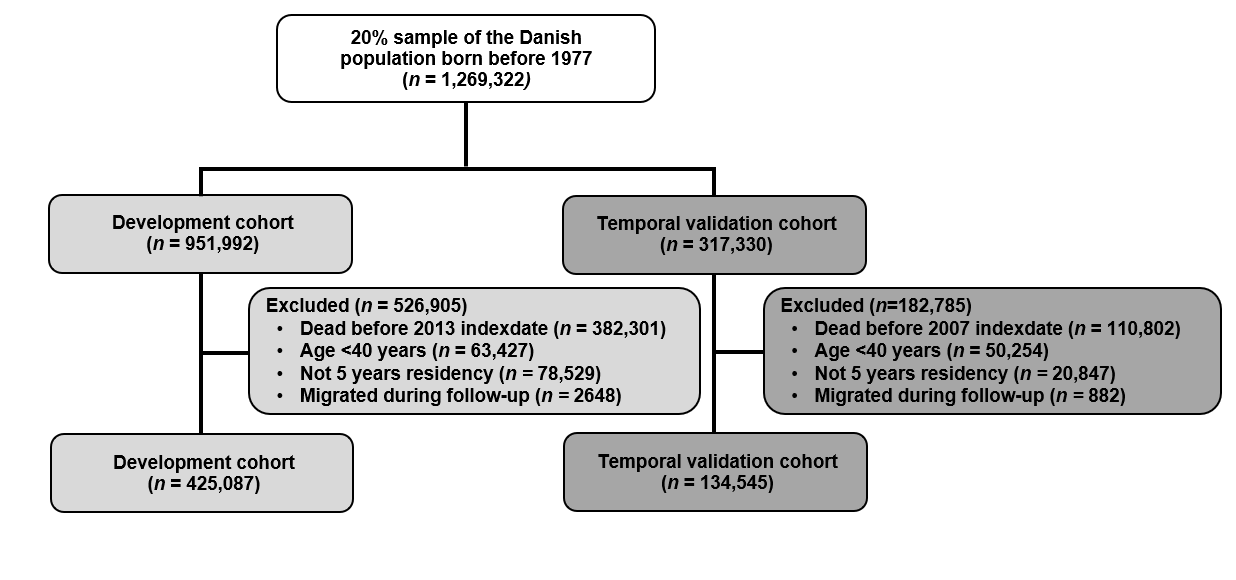
**

**Figure S2 Flowchart of selection of the six new-user validation cohorts**

**
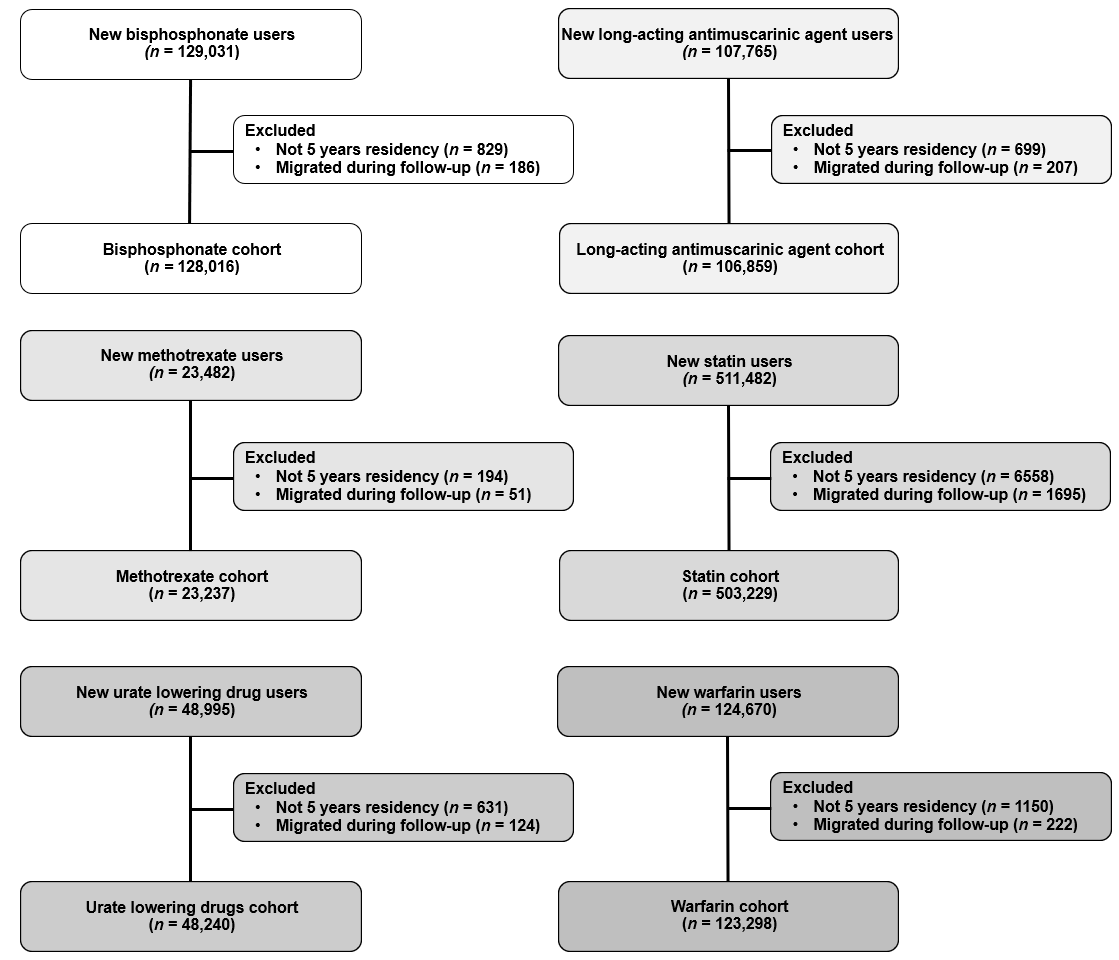
**

**Figure S3 c-statistic for each candidate predictor according to the strength of association with age**

For all candidate predictors the c-statistic (from a logistic regression model with the predictor and age as independent variables) to predict 5-year mortality and the strength of association of the predictor with age expressed by the Pearson’s correlation coefficient is shown.

**
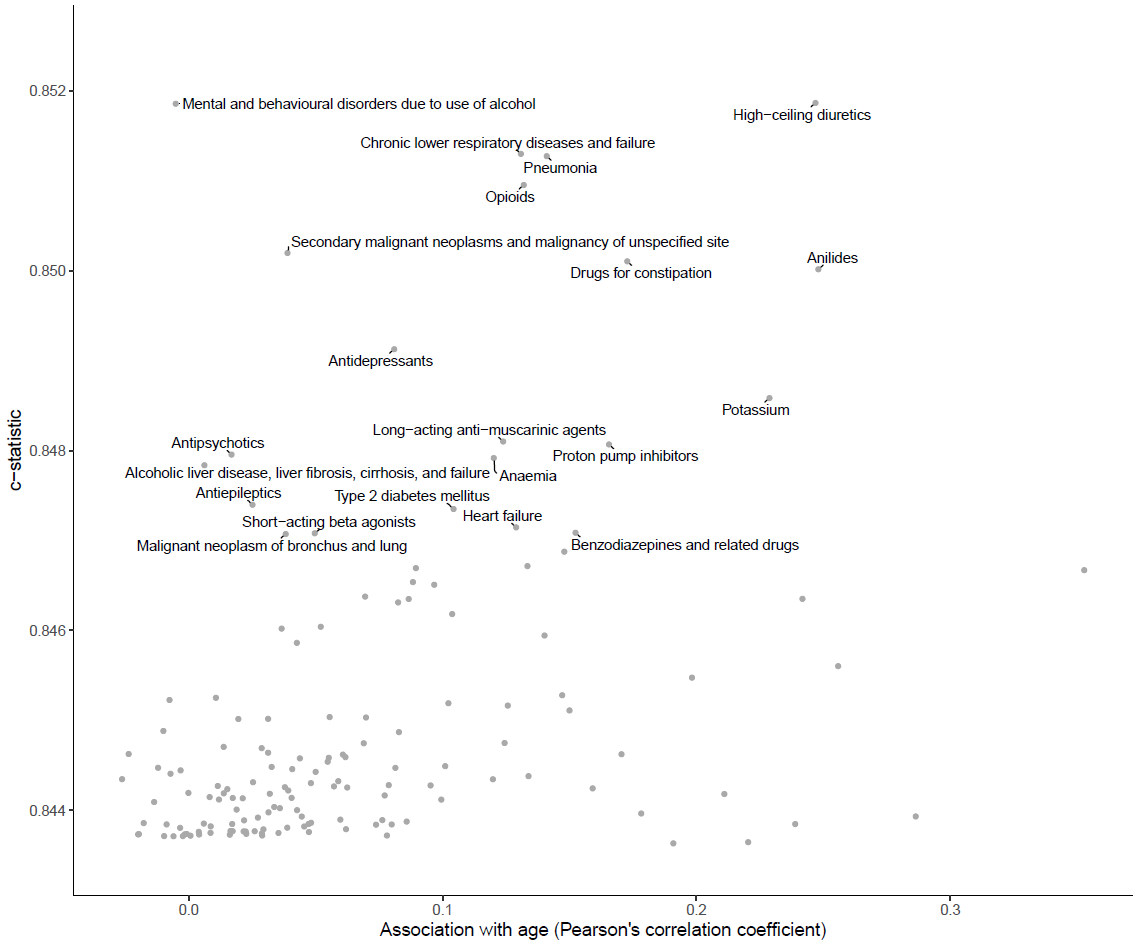
**

**Figure S4 Relationship between the c-statistic and the number of predictors remaining in the backwards elimination procedure besides age, sex, and the intercept**

**
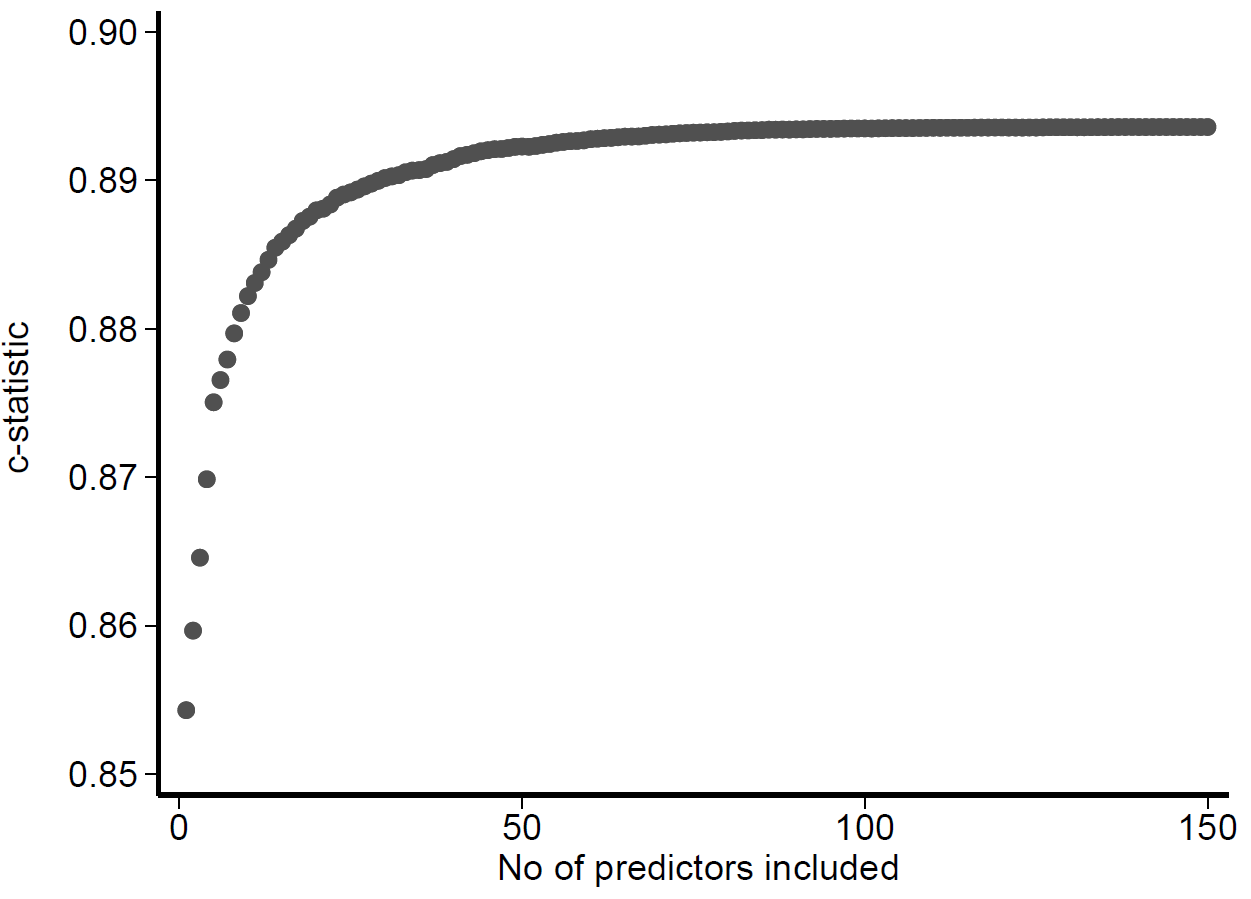
**

**Figure S5 ROC curves for 5-year mortality for the Charlson Comorbidity Index (CCI), the Elixhauser Comorbidity Index (ECI), and the Nordic Multimorbidity Index (NMI) with and without the base model (age and sex) in the new-user validation cohorts**

**
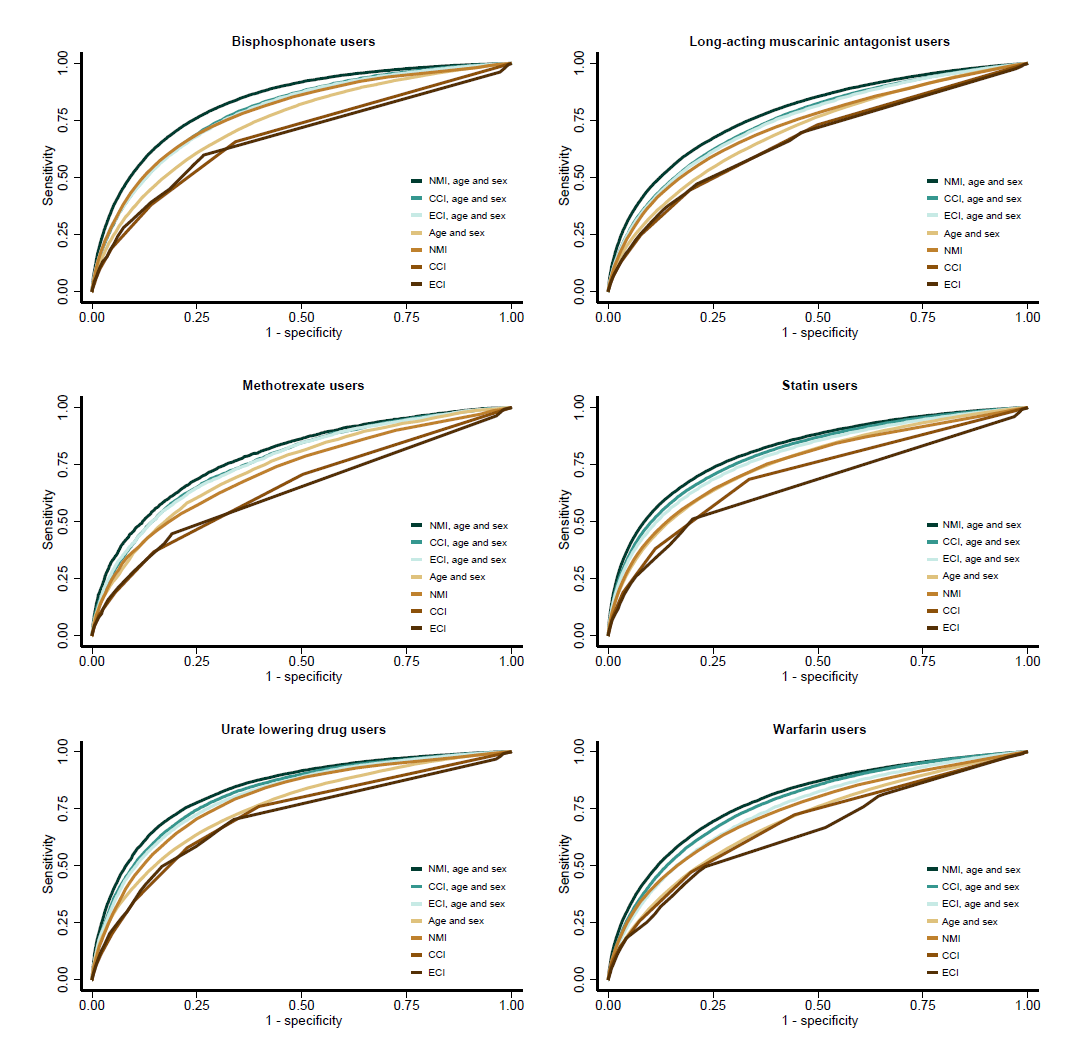
**

**Table S1 Baseline characteristics of the new user validation cohorts**

| **Characteristic (%)** | **Bisphosphonates** | **LAMA** | **Methotrexate** | **Statins** | **ULD** | **Warfarin** | |
| --- | --- | --- | --- | --- | --- | --- | --- |
|  | n = 128,016 | n = 106,859 | n = 23,237 | n = 503,229 | n = 48,240 | n = 123,298 | |
| **Age median, (p25-p75)** | 72 (65-79) | 71 (64-77) | 66 (60-73) | 66 (61-73) | 71 (63-78) | 73 (65-79) | |
| **Male** | 23,970 (18.7%) | 51,309 (48.0%) | 8538 (36.7%) | 242,344 (48.2%) | 30,945 (64.1%) | 68,761 (55.8%) | |
| **1-year mortality** | 7527 (5.9%) | 9957 (9.3%) | 564 (2.4%) | 13,163 (2.6%) | 4648 (9.6%) | 11,588 (9.4%) | |
| **2-year mortality** | 13,850 (10.8%) | 17,418 (16.3%) | 1129 (4.9%) | 25,045 (5.0%) | 7630 (15.8%) | 19,062 (15.5%) | |
| **5-year mortality** | 32,737 (25.6%) | 37,211 (34.8%) | 3012 (13.0%) | 64,927 (12.9%) | 15,110 (31.3%) | 38,739 (31.4%) | |
| **Selected common diagnoses (within 5 years)** |  |  |  |  |  |  | |
| Essential (primary) hypertension | 21,425 (16.7%) | 19,488 (18.2%) | 3334 (14.3%) | 89,742 (17.8%) | 12,734 (26.4%) | 36,948 (30.0%) | |
| Type 2 diabetes mellitus | 5513 (4.3%) | 6953 (6.5%) | 1220 (5.3%) | 32,640 (6.5%) | 5636 (11.7%) | 11,189 (9.1%) | |
| Atrial fibrillation and flutter | 8755 (6.8%) | 10,167 (9.5%) | 1102 (4.7%) | 31,658 (6.3%) | 7857 (16.3%) | 55,153 (44.7%) | |
| Chronic ischaemic heart disease | 8119 (6.3%) | 11,099 (10.4%) | 1264 (5.4%) | 31,834 (6.3%) | 7688 (15.9%) | 17,930 (14.5%) | |
| Heart failure | 5744 (4.5%) | 9311 (8.7%) | 697 (3.0%) | 20,969 (4.2%) | 7372 (15.3%) | 17,313 (14.0%) | |
| Cerebrovascular disease | 7877 (6.2%) | 6826 (6.4%) | 813 (3.5%) | 53,529 (10.6%) | 3766 (7.8%) | 14,102 (11.4%) | |
| Chronic lower respiratory diseases and failure | 15,926 (12.4%) | 41,499 (38.8%) | 1281 (5.5%) | 23,431 (4.7%) | 4589 (9.5%) | 12,621 (10.2%) | |
| Pneumonia | 12,006 (9.4%) | 19,325 (18.1%) | 1136 (4.9%) | 20,883 (4.1%) | 4896 (10.1%) | 14,354 (11.6%) | |
| Osteoporosis | 45,369 (35.4%) | 6270 (5.9%) | 1280 (5.5%) | 12,744 (2.5%) | 1301 (2.7%) | 4631 (3.8%) | |
| Anemia | 6896 (5.4%) | 4967 (4.6%) | 860 (3.7%) | 8938 (1.8%) | 3857 (8.0%) | 6029 (4.9%) | |
| **Selected common drug fills (within 6 months)** |  |  |  |  |  |  | |
| Platelet aggregation inhibitors excl. heparin | 33,891 (26.5%) | 35,584 (33.3%) | 5026 (21.6%) | 119,221 (23.7%) | 19,720 (40.9%) | 54,374 (44.1%) | |
| HMG CoA reductase inhibitors (statins) | 29,557 (23.1%) | 30,417 (28.5%) | 5151 (22.2%) | - | 17,975 (37.3%) | 37,234 (30.2%) | |
| ACE inhibitors incl. combinations | 20,875 (16.3%) | 22,479 (21.0%) | 3836 (16.5%) | 110,911 (22.0%) | 15,626 (32.4%) | 30,132 (24.4%) | |
| ARBs incl. combinations | 14,470 (11.3%) | 14,522 (13.6%) | 2908 (12.5%) | 71,107 (14.1%) | 9569 (19.8%) | 19,407 (15.7%) | |
| Low-ceiling diuretics | 22,979 (18.0%) | 19,968 (18.7%) | 4217 (18.1%) | 105,496 (21.0%) | 11,414 (23.7%) | 26,441 (21.4%) | |
| High-ceiling diuretics | 18,356 (14.3%) | 22,955 (21.5%) | 2423 (10.4%) | 41,832 (8.3%) | 20,040 (41.5%) | 26,576 (21.6%) | |
| Blood glucose lowering drugs, excl. insulins | 5495 (4.3%) | 7618 (7.1%) | 1630 (7.0%) | 47,523 (9.4%) | 5924 (12.3%) | 10,584 (8.6%) | |
| Anilides (paracetamol) | 39,543 (30.9%) | 25,575 (23.9%) | 6149 (26.5%) | 62,011 (12.3%) | 11,800 (24.5%) | 23,402 (19.0%) | |
| Benzodiazepines and related drugs | 30,805 (24.1%) | 26,534 (24.8%) | 4161 (17.9%) | 78,023 (15.5%) | 9098 (18.9%) | 24,608 (20.0%) | |
| Antidepressives | 21,889 (17.1%) | 20,294 (19.0%) | 2756 (11.9%) | 54,629 (10.9%) | 5642 (11.7%) | 14,981 (12.2%) | |
| Potassium | 16,859 (13.2%) | 17,809 (16.7%) | 2000 (8.6%) | 37,149 (7.4%) | 12,783 (26.5%) | 21,123 (17.1%) | |
| LAMA, Long-acting muscarinic antagonists; ULD, urate lowering drugs; ACE, Angiotensin converting enzyme; ARB, angiotensin receptor blockers | | | | | | |

**Table S2 Candidate predictors**

| **Predictor name** | **N (%)** | **ICD-10 or ATC code** |
| --- | --- | --- |
| Intestinal infectious diseases | 3615 (0.85%) | A00-A09 |
| Sepsis | 3304 (0.78%) | A40-A41 |
| Erysipelas | 2671 (0.63%) | A46 |
| Chronic viral hepatitis | 896 (0.21%) | B18 |
| HIV | 470 (0.11%) | B20-B24 |
| Candidiasis | 707 (0.17%) | B37 |
| Colorectal cancer | 2485 (0.58%) | C18-C20 |
| Malignant neoplasm of bronchus and lung | 1130 (0.27%) | C34 |
| Malignant melanoma of skin | 1264 (0.30%) | C43 |
| Malignant neoplasm of breast | 4953 (1.17%) | C50 |
| Malignant neoplasm of corpus uteri | 538 (0.13%) | C54 |
| Malignant neoplasm of prostate | 3706 (0.87%) | C61 |
| Malignant neoplasm of kidney, except renal pelvis | 453 (0.11%) | C64 |
| Malignant neoplasm of bladder | 537 (0.13%) | C67 |
| Tumor of brain or meninges | 987 (0.23%) | C70, C71, C751-C753, D32, D330-D332, D352-D354, D42, D430-D432, D443-D445 |
| Secondary malignant neoplasms and malignancy of unspecified site | 2301 (0.54%) | C76-C79, C80 |
| Lymphoma | 1055 (0.25%) | C81-C86 |
| Leukemia | 733 (0.17%) | C91-C95 |
| Anaemia | 7604 (1.79%) | D50-D59, D60-D64 |
| Coagulation defects | 1603 (0.38%) | D65-D69 |
| Connective tissue disease | 7008 (1.65%) | M05-M06, M08-M09, M30-M36, D86 |
| Other hypothyroidism | 3358 (0.79%) | E03 |
| Other nontoxic goitre | 3138 (0.74%) | E04 |
| Thyrotoxicosis [hyperthyroidism] | 2969 (0.70%) | E05 |
| Thyroiditis | 503 (0.12%) | E06 |
| Type 1 diabetes mellitus | 5462 (1.28%) | E10 |
| Type 2 diabetes mellitus | 14,650 (3.45%) | E11 |
| Unspecified diabetes mellitus | 2402 (0.57%) | E14 |
| Hyperparathyroidism and other disorders of parathyroid gland | 850 (0.20%) | E21 |
| Vitamin D deficiency | 1105 (0.26%) | E55 |
| Volume depletion | 4331 (1.02%) | E86 |
| Dementia | 3300 (0.78%) | F00-F03, G30 |
| Mental and behavioural disorders due to use of alcohol | 5523 (1.30%) | F10 |
| Mental and behavioural disorders due to use of tobacco | 3413 (0.80%) | F17 |
| Schizophrenia | 526 (0.12%) | F20 |
| Depression | 3780 (0.89%) | F32-F33 |
| Parkinson's disease and other parkinsonism | 1204 (0.28%) | G20-G22 |
| Multiple sclerosis | 1283 (0.30%) | G35 |
| Epilepsy | 3031 (0.71%) | G40-G41 |
| Transient cerebral ischaemic attacks and related syndromes | 4142 (0.97%) | G45 |
| Polyneuropathies | 2196 (0.52%) | G60-G63 |
| Cerebral palsy and other paralytic syndromes | 814 (0.19%) | G80-G83 |
| Aortic and mitral valve disease | 5310 (1.25%) | I05-I06, I34-I35 |
| Essential (primary) hypertension | 39,383 (9.26%) | I10 |
| Heart failure | 7099 (1.67%) | I110, I130, I132, I420, I426-I429, I50 |
| Secondary hypertension | 1257 (0.30%) | I15 |
| Acute myocardial infarction and other acute ischemic heart diseases | 5557 (1.31%) | I21-I24 |
| Chronic ischaemic heart disease | 12,529 (2.95%) | I25 |
| Pulmonary embolism | 1706 (0.40%) | I26 |
| Other pulmonary heart diseases | 457 (0.11%) | I27 |
| Atrioventricular and left bundle-branch block | 1641 (0.39%) | I44 |
| Atrial fibrillation and flutter | 14,143 (3.33%) | I48 |
| Cerebrovascular disease | 11,825 (2.78%) | I60-I69 |
| **Predictor name** | **N (%)** | **ICD-10 or ATC code** |
| Ateroschlerosis, thrombosis, embolism, and other peripheral arterial disease | 6270 (1.47%) | I70, I73-I74, I77 |
| Aneurysm and dissection of aorta and other arteries | 2024 (0.48%) | I71-I72 |
| Deep venous thrombosis | 2920 (0.69%) | I801-I803 |
| Pneumonia | 12,455 (2.93%) | J12-J18 |
| Chronic lower respiratory diseases and failure | 11,822 (2.78%) | J41-J44, J47, J961, J969 |
| Other interstitial pulmonary diseases | 567 (0.13%) | J84 |
| Pneumothorax | 585 (0.14%) | J93 |
| Diseases of teeth and supporting structures | 2589 (0.61%) | K02-K06, K08 |
| Peptic ulcer | 3567 (0.84%) | K221, K25-K28 |
| Acute appendicitis | 1558 (0.37%) | K35 |
| Crohn disease [regional enteritis] | 1179 (0.28%) | K50 |
| Ulcerative colitis | 2243 (0.53%) | K51 |
| Paralytic ileus and intestinal obstruction without hernia | 1701 (0.40%) | K56 |
| Peritonitis | 575 (0.14%) | K65 |
| Alcoholic liver disease, liver fibrosis, cirrhosis, and failure | 1488 (0.35%) | K70, K72, K74, K766-K667 |
| Cholelithiasis | 6376 (1.50%) | K80 |
| Cholecystitis | 943 (0.22%) | K81 |
| Other diseases of biliary tract | 594 (0.14%) | K83 |
| Pancreatitis, acute or chronic | 1648 (0.39%) | K85-K86 |
| Psoriasis or psoriatic artritis | 1967 (0.46%) | L40, M070-M073 |
| Decubitus ulcer and pressure area | 523 (0.12%) | L89 |
| Infectious athropathies | 899 (0.21%) | M00-M03 |
| Gout | 1740 (0.41%) | M10 |
| Osteoporosis | 10,994 (2.59%) | M80-M82 |
| Glomerular and tubulo-intestitial renal diseases | 2744 (0.65%) | N00-N08, N10-N16 |
| Acute renal failure | 783 (0.18%) | N17 |
| Chronic kidney disease and unspecified kidney failure | 3425 (0.81%) | N18-N19 |
| Calculus of kidney and ureter | 3698 (0.87%) | N20 |
| Cystic kidney disease | 565 (0.13%) | Q61 |
| Magnesium compounds | 3064 (0.72%) | A02AA |
| Proton pump inhibitors | 49,977 (11.76%) | A02BC |
| Propulsives | 4166 (0.98%) | A03FA |
| Drugs for constipation | 8966 (2.11%) | A06A |
| Antipropulsives | 1259 (0.30%) | A07DA |
| Intestinal antiinflammatory agents | 2927 (0.69%) | A07E |
| Insulins and analogues | 8417 (1.98%) | A10A |
| Blood glucose lowering drugs, excl. insulins | 24,607 (5.79%) | A10B |
| Calcium | 953 (0.22%) | A12A |
| Potassium | 19,410 (4.57%) | A12BA |
| Vitamin k antagonists | 11,614 (2.73%) | B01AA |
| Platelet aggregation inhibitors excl. heparin | 58,600 (13.79%) | B01AC |
| Direct thrombin and factor Xa inhibitors | 2980 (0.70%) | B01AE, B01AF |
| Iron preparations | 1955 (0.46%) | B03A |
| Vitamin b12 and folic acid | 10,540 (2.48%) | B03B |
| Digitalis glycosides | 5014 (1.18%) | C01AA |
| Antiarrhythmics, class i and iii | 1273 (0.30%) | C01B |
| Organic nitrates | 6254 (1.47%) | C01DA |
| Antiadrenergic agents, centrally acting | 929 (0.22%) | C02A |
| Antiadrenergic agents, peripherally acting | 1288 (0.30%) | C02C |
| Low-ceiling diuretics | 37,330 (8.78%) | C03A, C03B, C03EA |
| High-ceiling diuretics | 20,669 (4.86%) | C03C, C03EB |
| Aldosterone antagonists | 5854 (1.38%) | C03DA |
| Beta blocking agents | 47,222 (11.11%) | C07A |
| Selective calcium channel blockers with mainly vascular effects | 48,098 (11.31%) | C08C |
| Selective calcium channel blockers with direct cardiac effects | 3532 (0.83%) | C08D |
| ACE inhibitors incl. combinations | 53,473 (12.58%) | C09A, C09B |
| ARBs incl. combinations | 41,065 (9.66%) | C09C, C09D |
| HMG CoA reductase inhibitors (statins) | 80,026 (18.83%) | C10AA |
| **Predictor name** | **N (%)** | **ICD-10 or ATC code** |
| Fibrates | 627 (0.15%) | C10AB |
| Other lipid modifying agents | 1856 (0.44%) | C10AX |
| Antipsoriatics for topical use | 2094 (0.49%) | D05A |
| Glucocorticoids for systemic use | 12,839 (3.02%) | H02AB |
| Thyroid hormones | 15,353 (3.61%) | H03AA |
| Antithyroid preparations | 2469 (0.58%) | H03B |
| Tetracyclines | 2672 (0.63%) | J01AA |
| Beta-lactam antibacterials, penicillins | 61,588 (14.49%) | J01C |
| Sulfonamides and trimethoprim | 8714 (2.05%) | J01E |
| Macrolides, lincosamides and streptogramins | 16,118 (3.79%) | J01F |
| Quinolone antibacterials | 5400 (1.27%) | J01M |
| Nitrofuran derivatives | 2930 (0.69%) | J01XE |
| Antimycotics for systemic use | 6148 (1.45%) | J02A |
| Immunosuppressants | 3660 (0.86%) | L04A |
| Muscle relaxants, centrally acting agents | 3938 (0.93%) | M03B |
| Antigout preparations | 6131 (1.44%) | M04A |
| Bisphosphonates incl. combinations | 12,271 (2.89%) | M05BA, M04BB |
| Opioids | 36,418 (8.57%) | N02A |
| Anilides | 41,763 (9.82%) | N02BE |
| Antiepileptics | 13,817 (3.25%) | N03A |
| Anti-parkinson drugs | 4339 (1.02%) | N04 |
| Antipsychotics | 10,221 (2.40%) | N05A excl. N05AN |
| Lithium | 993 (0.23%) | N05AN |
| Benzodiazepines and related drugs | 33,026 (7.77%) | N05BA, N05CD, N05CF |
| Melatonin receptor agonists | 1594 (0.37%) | N05CH |
| Antidepressants | 42,605 (10.02%) | N06A |
| Anti-dementia drugs | 2534 (0.60%) | N06D |
| Drugs used in alcohol dependence | 1592 (0.37%) | N07BB |
| Drugs used in opioid dependence | 980 (0.23%) | N07BC |
| Nitroimidazole derivatives | 4074 (0.96%) | P01AB |
| Short-acting beta agonists | 15,401 (3.62%) | R03AC02-05 |
| Long-acting beta agonists | 4109 (0.97%) | R03AC12-13, R03AC18-19 |
| LABA, LAMA, ICS combinations | 15,047 (3.54%) | R03AK06-08, R03AK10-11, R03AK14, R03AL03-09 |
| Glucocorticoids, inhalants | 8149 (1.92%) | R03BA |
| Long-acting anti-muscarinic agents | 8938 (2.10%) | R03BB04-07 |
| Adrenergics for systemic use | 459 (0.11%) | R03C |
| Leukotriene receptor antagonists | 1535 (0.36%) | R03DC |
| Mucolytics | 1481 (0.35%) | R05CB |
| Cough suppressants | 13,622 (3.20%) | R05D, R05F |

**Appendix A**

**Coding algorithms and weights for the Charlson comorbidities.**

| **Comorbidities** | **ICD-10, Quan 2005** | **Weight, Charlson 1987** | **Weight, Quan 2011** |
| --- | --- | --- | --- |
| Myocardial infarction | I21.x, I22.x, I25.2 | 1 | 0 |
| Congestive heart failure | I09.9, I11.0, I13.0, I13.2, I25.5, I42.0, I42.5–I42.9, I43.x, I50.x, P29.0 | 1 | 2 |
| Peripheral vascular disease | I70.x, I71.x, I73.1, I73.8, I73.9, I77.1, I79.0, I79.2, K55.1, K55.8, K55.9, Z95.8, Z95.9 | 1 | 0 |
| Cerebrovascular disease | G45.x, G46.x, H34.0, I60.x–I69.x | 1 | 0 |
| Dementia | F00.x–F03.x, F05.1, G30.x, G31.1 | 1 | 2 |
| Chronic pulmonary disease | I27.8, I27.9, J40.x–J47.x, J60.x–J67.x, J68.4, J70.1, J70.3 | 1 | 1 |
| Rheumatic disease | M05.x, M06.x, M31.5, M32.x–M34.x, M35.1, M35.3, M36.0 | 1 | 1 |
| Peptic ulcer disease | K25.x–K28.x | 1 | 0 |
| Mild liver disease | B18.x, K70.0–K70.3, K70.9, K71.3–K71.5, K71.7, K73.x, K74.x, K76.0, K76.2–K76.4, K76.8, K76.9, Z94.4 | 1 | 2 |
| Diabetes without chronic complication | E10.0, E10.1, E10.6, E10.8, E10.9, E11.0, E11.1, E11.6, E11.8, E11.9, E12.0, E12.1, E12.6, E12.8, E12.9, E13.0, E13.1, E13.6, E13.8, E13.9, E14.0, E14.1, E14.6, E14.8, E14.9 | 1 | 0 |
| Diabetes with chronic complication | E10.2–E10.5, E10.7, E11.2–E11.5, E11.7, E12.2–E12.5, E12.7, E13.2– E13.5, E13.7, E14.2–E14.5, E14.7 | 2 | 1 |
| Hemiplegia or paraplegia | G04.1, G11.4, G80.1, G80.2, G81.x, G82.x, G83.0–G83.4, G83.9 | 2 | 2 |
| Renal disease | I12.0, I13.1, N03.2–N03.7, N05.2– N05.7, N18.x, N19.x, N25.0, Z49.0–Z49.2, Z94.0, Z99.2 | 2 | 1 |
| Any malignancy, including lymphoma and leukemia, except malignant neoplasm of skin | C00.x–C26.x, C30.x–C34.x, C37.x– C41.x, C43.x, C45.x–C58.x, C60.x–C76.x, C81.x–C85.x, C88.x, C90.x–C97.x | 2 | 2 |
| Moderate or severe liver disease | I85.0, I85.9, I86.4, I98.2, K70.4, K71.1, K72.1, K72.9, K76.5, K76.6, K76.7 | 3 | 4 |
| Metastatic solid tumor | C77.x–C80.x | 6 | 6 |
| AIDS/HIV | B20.x–B22.x, B24.x | 6 | 4 |

The same comorbidities with different severity were mutually exclusive: diabetes with chronic complications and diabetes without chronic complications; mild liver disease and moderate or severe liver disease; and any malignancy and metastatic solid tumor.

Charlson, 1987: Charlson ME, Pompei P, Ales KL, MacKenzie CR. A new method of classifying prognostic comorbidi-ty in longitudinal studies: development and validation. J Chronic Dis. 1987;40(5):373-383. doi:10.1016/0021-9681(87)90171-8

Quan, 2005: Quan H, Sundararajan V, Halfon P, et al. Coding Algorithms for Defining Comorbidities in ICD-9-CM and ICD-10 Administrative Data. Medical Care. 2005;43(11):1130-1139. doi:10.1097/01.mlr.0000182534.19832.83

Quan, 2011: Quan H, Li B, Couris CM, et al. Updating and Validating the Charlson Comorbidity Index and Score for Risk Adjustment in Hospital Discharge Abstracts Using Data From 6 Countries. American Journal of Epidemiology. 2011;173(6):676-682. doi:10.1093/aje/kwq433

**Appendix B**

**Coding algorithms and weights for the Elixhauser comorbidities.**

| **Comorbidities** | **ICD-10, Quan 2005** | **Weight, van Walraven 2009** |
| --- | --- | --- |
| Congestive heart failure | I09.9, I11.0, I13.0, I13.2, I25.5, I42.0, I42.5–I42.9, I43.x, I50.x, P29.0 | 7 |
| Cardiac arrhythmias | I44.1–I44.3, I45.6, I45.9, I47.x–I49.x, R00.0, R00.1, R00.8, T82.1, Z45.0, Z95.0 | 5 |
| Valvular disease | A52.0, I05.x–I08.x, I09.1, I09.8, I34.x–I39.x, Q23.0–Q23.3, Z95.2–Z95.4 | -1 |
| Pulmonary circulation disorders | I26.x, I27.x, I28.0, I28.8, I28.9 | 4 |
| Peripheral vascular disorders | I70.x, I71.x, I73.1, I73.8, I73.9, I77.1, I79.0, I79.2, K55.1, K55.8, K55.9, Z95.8, Z95.9 | 2 |
| Hypertension, uncomplicated | I10.x | 0 |
| Hypertension, complicated | I11.x - I13.x, I15.x | 0 |
| Paralysis | G04.1, G11.4, G80.1, G80.2, G81.x, G82.x, G83.0–G83.4, G83.9 | 7 |
| Other neurological disorders | G10.x–G13.x, G20.x–G22.x, G25.4, G25.5, G31.2, G31.8, G31.9, G32.x, G35.x - G37.x, G40.x, G41.x, G93.1, G93.4, R47.0, R56.x | 6 |
| Chronic pulmonary disease | I27.8, I27.9, J40.x–J47.x, J60.x–J67.x, J68.4, J70.1, J70.3 | 3 |
| Diabetes, uncomplicated | E10.0, E10.1, E10.9, E11.0, E11.1, E11.9, E12.0, E12.1, E12.9, E13.0, E13.1, E13.9, E14.0, E14.1, E14.9 | 0 |
| Diabetes, complicated | E10.2–E10.8, E11.2–E11.8, E12.2–E12.8, E13.2–E13.8, E14.2–E14.8 | 0 |
| Hypothyroidism | E00.x - E03.x, E89.0 | 0 |
| Renal failure | I12.0, I13.1, N18.x, N19.x, N25.0, Z49.0–Z49.2, Z94.0, Z99.2 | 5 |
| Liver disease | B18.x, I85.x, I86.4, I98.2, K70.x, K71.1, K71.3–K71.5, K71.7, K72.x - K74.x, K76.0, K76.2 - K76.9, Z94.4 | 11 |
| Peptic ulcer disease, excl. bleeding | K25.7, K25.9, K26.7, K26.9, K27.7, K27.9, K28.7, K28.9 | 0 |
| AIDS/HIV | B20.x–B22.x, B24.x | 0 |
| Lymphoma | C81.x–C85.x, C88.x, C96.x, C90.0, C90.2 | 9 |
| Metastatic cancer | C77.x–C80.x | 12 |
| Solid tumor without metastasis | C00.x–C26.x, C30.x–C34.x, C37.x–C41.x, C43.x, C45.x–C58.x, C60.x–C76.x, C97.x | 4 |
| Rheumatoid arthritis/collagen vascular diseases | L94.0, L94.1, L94.3, M05.x, M06.x, M08.x, M12.0, M12.3, M30.x, M31.0–M31.3, M32.x–M35.x, M45.x, M46.1, M46.8, M46.9 | 0 |
| Coagulopathy | D65–D68.x, D69.1, D69.3–D69.6 | 3 |
| Obesity | E66.x | -4 |
| Weight loss | E40.x–E46.x, R63.4, R64 | 6 |
| Fluid and electrolyte disorders | E22.2, E86.x, E87.x | 5 |
| Blood loss anemia | D50.0 | -2 |
| Deficiency anemia | D50.8, D50.9, D51.x–D53.x | -2 |
| Alcohol abuse | F10, E52, G62.1, I42.6, K29.2, K70.0, K70.3, K70.9, T51.x, Z50.2, Z71.4, Z72.1 | 0 |
| Drug abuse | F11.x–F16.x, F18.x, F19.x, Z71.5, Z72.2 | -7 |
| Psychoses | F20.x, F22.x–F25.x, F28.x, F29.x, F30.2, F31.2, F31.5 | 0 |
| Depression | F20.4, F31.3–F31.5, F32.x, F33.x, F34.1, F41.2, F43.2 | -3 |

Quan, 2005: Quan H, Sundararajan V, Halfon P, et al. Coding Algorithms for Defining Comorbidities in ICD-9-CM and ICD-10 Administrative Data. Medical Care. 2005;43(11):1130-1139. doi:10.1097/01.mlr.0000182534.19832.83

van Walraven, 2009: van Walraven C, Austin PC, Jennings A, Quan H, Forster AJ. A Modification of the Elixhauser Comorbidity Measures Into a Point System for Hospital Death Using Administrative Data. Medical Care. 2009;47(6):626-633. doi:10.1097/MLR.0b013e31819432e5
